# Supplementary material for: Updated checklist of Azores Chondrichthyes (Vertebrata: Gnathostomata)
Source: Biodivers Data J. 2021 Mar 11;9:e62813. doi: 10.3897/BDJ.9.e62813 (PMC9848621; doi:10.3897/BDJ.9.e62813)
Supplement: Supplementary material 1 — Species list - taxon remarks and occurrence details [file bdj-09-e62813-s001.xlsx]

## Sheet: Supplementary file
Order	Family	Scientific Name	Taxon Remarks	occurrence details	IUCN conservation status	IUCN status reference
Chimaeriformes	Rhinochimaeridae	Rhinochimaera atlantica Holt & Byrne, 1909		Das and Afonso (2017)	least concern	Dagit, D.D. & Compagno, L.J.V. 2006. Rhinochimaera atlantica. The IUCN Red List of Threatened Species 2006: e.T60145A12312921. https://dx.doi.org/10.2305/IUCN.UK.2006.RLTS.T60145A12312921.en. Downloaded on July 2020.
Chimaeriformes	Chimaeridae	Hydrolagus pallidus Hardy & Stehmann, 1990		Barreiros and Gadig (2011)	least concern	Dagit, D.D. & Clarke, M.W. 2007. Hydrolagus pallidus. The IUCN Red List of Threatened Species 2007: e.T63103A12604274. https://dx.doi.org/10.2305/IUCN.UK.2007.RLTS.T63103A12604274.en. Downloaded on July 2020
Chimaeriformes	Chimaeridae	Hydrolagus affinis (de Brito Capello, 1868)		Das and Afonso (2017)	least concern	Dagit, D.D. & Clarke, M.W. 2007. Hydrolagus affinis. The IUCN Red List of Threatened Species 2007: e.T63123A12616352. https://dx.doi.org/10.2305/IUCN.UK.2007.RLTS.T63123A12616352.en. Downloaded on July 2020.
Chimaeriformes	Chimaeridae	Chimaera opalescens Luchetti, Iglésias & Sellos, 2011	new record	Catarino et al (2020)	least concern	Finucci, B. 2020. Chimaera opalescens. The IUCN Red List of Threatened Species 2020: e.T18901743A124549504. https://dx.doi.org/10.2305/IUCN.UK.2020-2.RLTS.T18901743A124549504.en. Downloaded on July 2020.
Chimaeriformes	Chimaeridae	Chimaera monstrosa Linnaeus, 1758		Barreiros and Gadig (2011)	near threatened	Dagit, D.D., Hareide, N. & Clo, S. 2007. Chimaera monstrosa. The IUCN Red List of Threatened Species 2007: e.T63114A12610445. https://dx.doi.org/10.2305/IUCN.UK.2007.RLTS.T63114A12610445.en. Downloaded on July 2020.
Carcharhiniformes	Sphyrnidae	Sphyrna zygaena (Linnaeus, 1758)		Barreiros and Gadig (2011)	vulnerable	Rigby, C.L., Barreto, R., Carlson, J., Fernando, D., Fordham, S., Herman, K., Jabado, R.W., Liu, K.M., Marshall, A., Pacoureau, N., Romanov, E., Sherley, R.B. & Winker, H. 2019. Sphyrna zygaena. The IUCN Red List of Threatened Species 2019: e.T39388A2921825. Downloaded on July 2020.
Carcharhiniformes	Carcharhinidae	Prionace glauca (Linnaeus, 1758)		Barreiros and Gadig (2011)	near threatened	Rigby, C.L., Barreto, R., Carlson, J., Fernando, D., Fordham, S., Francis, M.P., Herman, K., Jabado, R.W., Liu, K.M., Marshall, A., Pacoureau, N., Romanov, E., Sherley, R.B. & Winker, H. 2019. Prionace glauca. The IUCN Red List of Threatened Species 2019: e.T39381A2915850. https://dx.doi.org/10.2305/IUCN.UK.2019-3.RLTS.T39381A2915850.en. Downloaded on July 2020.
Carcharhiniformes	Carcharhinidae	Galeocerdo cuvier (Péron & Lesueur, 1822)		Barreiros and Gadig (2011)	near threatened	Ferreira, L.C. & Simpfendorfer, C. 2019. Galeocerdo cuvier. The IUCN Red List of Threatened Species 2019: e.T39378A2913541. https://dx.doi.org/10.2305/IUCN.UK.2019-1.RLTS.T39378A2913541.en. Downloaded on July 2020.
Carcharhiniformes	Carcharhinidae	Carcharhinus longimanus (Poey, 1861)		Barreiros and Gadig (2011)	vulnerable	Rigby, C.L., Barreto, R., Carlson, J., Fernando, D., Fordham, S., Francis, M.P., Herman, K., Jabado, R.W., Liu, K.M., Marshall, A., Pacoureau, N., Romanov, E., Sherley, R.B. & Winker, H. 2019. Carcharhinus longimanus. The IUCN Red List of Threatened Species 2019: e.T39374A2911619. https://dx.doi.org/10.2305/IUCN.UK.2019-3.RLTS.T39374A2911619.en. Downloaded on July 2020.
Carcharhiniformes	Carcharhinidae	Carcharhinus leucas (Valenciennes, 1839)		Barreiros and Gadig (2011)	near threatened	Simpfendorfer, C. & Burgess, G.H. 2009. Carcharhinus leucas. The IUCN Red List of Threatened Species 2009: e.T39372A10187195. https://dx.doi.org/10.2305/IUCN.UK.2009-2.RLTS.T39372A10187195.en. Downloaded on July 2020.
Carcharhiniformes	Carcharhinidae	Carcharhinus galapagensis (Snodgrass & Heller, 1905)		Barreiros and Gadig (2011)	near threatened	Kyne, P.M., Barreto, R., Carlson, J., Fernando, D., Fordham, S., Francis, M.P., Herman, K., Jabado, R.W., Liu, K.M., Pacoureau, N., Romanov, E. & Sherley, R.B. 2019. Carcharhinus galapagensis. The IUCN Red List of Threatened Species 2019: e.T41736A2954286. https://dx.doi.org/10.2305/IUCN.UK.2019-3.RLTS.T41736A2954286.en. Downloaded on July 2020.
Carcharhiniformes	Triakidae	Galeorhinus galeus (Linnaeus, 1758)		Barreiros and Gadig (2011)	vulnerable	Walker, T.I., Cavanagh, R.D., Stevens, J.D., Carlisle, A.B., Chiaramonte, G.E., Domingo, A., Ebert, D.A., Mancusi, C.M., Massa, A., McCord, M., Morey, G., Paul, L.J., Serena, F. & Vooren, C.M. 2006. Galeorhinus galeus. The IUCN Red List of Threatened Species 2006: e.T39352A10212764. https://dx.doi.org/10.2305/IUCN.UK.2006.RLTS.T39352A10212764.en. Downloaded on July 2020.
Carcharhiniformes	Pseudotriakidae	Pseudotriakis microdon de Brito Capello, 1868		Barreiros and Gadig (2011)	least concern	Kyne, P.M., Yano , K. & White, W.T. 2015. Pseudotriakis microdon. The IUCN Red List of Threatened Species 2015: e.T44566A2995045. https://dx.doi.org/10.2305/IUCN.UK.2015-4.RLTS.T44566A2995045.en. Downloaded on July 2020.
Carcharhiniformes	Scyliorhinidae	Scyliorhinus canicula (Linnaeus, 1758)		Barreiros and Gadig (2011)	least concern	Ellis, J., Mancusi, C., Serena, F., Haka, F., Guallart, J., Ungaro, N., Coelho, R., Schembri, T. & MacKenzie, K. 2009. Scyliorhinus canicula. The IUCN Red List of Threatened Species 2009: e.T161399A5415204. https://dx.doi.org/10.2305/IUCN.UK.2009-2.RLTS.T161399A5415204.en. Downloaded on July 2020.
Carcharhiniformes	Pentanchidae	Galeus murinus (Collett, 1904)	formerly in the family Scyliorhinidae	Barreiros and Gadig (2011)	least concern	Iglesias, S. 2015. Galeus murinus. The IUCN Red List of Threatened Species 2015: e.T161705A48941031. https://dx.doi.org/10.2305/IUCN.UK.2015-1.RLTS.T161705A48941031.en. Downloaded on July 2020.
Carcharhiniformes	Pentanchidae	Apristurus manis (Springer, 1979)	new record	Santos et al (2020)	least concern	Pollom, R., Ebert, D.A. & Leslie, R. 2019. Apristurus manis. The IUCN Red List of Threatened Species 2019: e.T44599A124434315. https://dx.doi.org/10.2305/IUCN.UK.2019-2.RLTS.T44599A124434315.en. Downloaded on February 2021
Carcharhiniformes	Pentanchidae	Apristurus laurussonii (Saemundsson, 1922)	formerly in the family Scyliorhinidae	Das and Afonso (2017)	data deficient	Duffy, C. & Huveneers, C. 2007. Apristurus laurussonii. The IUCN Red List of Threatened Species 2007: e.T44216A10873136. https://dx.doi.org/10.2305/IUCN.UK.2007.RLTS.T44216A10873136.en. Downloaded on July 2020.
Lamniformes	Lamnidae	Lamna nasus (Bonnaterre, 1788)		Barreiros and Gadig (2011)	vulnerable	Rigby, C.L., Barreto, R., Carlson, J., Fernando, D., Fordham, S., Francis, M.P., Herman, K., Jabado, R.W., Liu, K.M., Marshall, A., Pacoureau, N., Romanov, E., Sherley, R.B. & Winker, H. 2019. Lamna nasus. The IUCN Red List of Threatened Species 2019: e.T11200A500969. https://dx.doi.org/10.2305/IUCN.UK.2019-3.RLTS.T11200A500969.en. Downloaded on July 2020.
Lamniformes	Lamnidae	Isurus paucus Guitart Manday, 1966		Das and Afonso (2017)	endangered	Rigby, C.L., Barreto, R., Carlson, J., Fernando, D., Fordham, S., Francis, M.P., Jabado, R.W., Liu, K.M., Marshall, A., Pacoureau, N., Romanov, E., Sherley, R.B. & Winker, H. 2019. Isurus paucus. The IUCN Red List of Threatened Species 2019: e.T60225A3095898. https://dx.doi.org/10.2305/IUCN.UK.2019-1.RLTS.T60225A3095898.en. Downloaded on July 2020.
Lamniformes	Lamnidae	Isurus oxyrinchus Rafinesque, 1810		Barreiros and Gadig (2011)	vulnerable	Rigby, C.L., Barreto, R., Carlson, J., Fernando, D., Fordham, S., Francis, M.P., Jabado, R.W., Liu, K.M., Marshall, A., Pacoureau, N., Romanov, E., Sherley, R.B. & Winker, H. 2019. Isurus oxyrinchus. The IUCN Red List of Threatened Species 2019: e.T39341A2903170. https://dx.doi.org/10.2305/IUCN.UK.2019-1.RLTS.T39341A2903170.en. Downloaded on July 2020.
Lamniformes	Lamnidae	Carcharodon carcharias (Linnaeus, 1758)		Barreiros and Gadig (2011)	vulnerable	Rigby, C.L., Barreto, R., Carlson, J., Fernando, D., Fordham, S., Francis, M.P., Herman, K., Jabado, R.W., Liu, K.M., Lowe, C.G, Marshall, A., Pacoureau, N., Romanov, E., Sherley, R.B. & Winker, H. 2019. Carcharodon carcharias. The IUCN Red List of Threatened Species 2019: e.T3855A2878674. https://dx.doi.org/10.2305/IUCN.UK.2019-3.RLTS.T3855A2878674.en. Downloaded on July 2020.
Lamniformes	Cetorhinidae	Cetorhinus maximus (Gunnerus, 1765)		Barreiros and Gadig (2011)	vulnerable	Rigby, C.L., Barreto, R., Carlson, J., Fernando, D., Fordham, S., Francis, M.P., Herman, K., Jabado, R.W., Liu, K.M., Marshall, A., Romanov, E. & Kyne, P.M. 2019. Cetorhinus maximus (errata version published in 2020). The IUCN Red List of Threatened Species 2019: e.T4292A166822294. https://dx.doi.org/10.2305/IUCN.UK.2019-3.RLTS.T4292A166822294.en. Downloaded on July 2020.
Lamniformes	Alopiidae	Alopias vulpinus (Bonnaterre, 1788)		Barreiros and Gadig (2011)	vulnerable	Rigby, C.L., Barreto, R., Fernando, D., Carlson, J., Fordham, S., Francis, M.P., Herman, K., Jabado, R.W., Liu, K.M., Marshall, A., Pacoureau, N., Romanov, E., Sherley, R.B. & Winker, H. 2019. Alopias vulpinus. The IUCN Red List of Threatened Species 2019: e.T39339A2900765. https://dx.doi.org/10.2305/IUCN.UK.2019-3.RLTS.T39339A2900765.en. Downloaded on July 2020.
Lamniformes	Alopiidae	Alopias superciliosus (Lowe, 1841)		Barreiros and Gadig (2011)	vulnerable	Rigby, C.L., Barreto, R., Carlson, J., Fernando, D., Fordham, S., Francis, M.P., Herman, K., Jabado, R.W., Liu, K.M., Marshall, A., Pacoureau, N., Romanov, E., Sherley, R.B. & Winker, H. 2019. Alopias superciliosus. The IUCN Red List of Threatened Species 2019: e.T161696A894216. https://dx.doi.org/10.2305/IUCN.UK.2019-3.RLTS.T161696A894216.en. Downloaded on July 2020.
Lamniformes	Odontaspididae	Odontaspis ferox (Risso, 1810)		Barreiros and Gadig (2011)	vulnerable	Graham, K.J., Pollard, D.A., Gordon, I., Williams, S., Flaherty, A.A., Fergusson, I. & Dicken, M. 2016. Odontaspis ferox (errata version published in 2016). The IUCN Red List of Threatened Species 2016: e.T41876A103433002. https://dx.doi.org/10.2305/IUCN.UK.2016-1.RLTS.T41876A2957320.en. Downloaded on July 2020.
Orectolobiformes	Rhincodontidae	Rhincodon typus Smith, 1828		Barreiros and Gadig (2011)	endangered	Pierce, S.J. & Norman, B. 2016. Rhincodon typus. The IUCN Red List of Threatened Species 2016: e.T19488A2365291. https://dx.doi.org/10.2305/IUCN.UK.2016-1.RLTS.T19488A2365291.en. Downloaded on July 2020.
Squaliformes	Dalatiidae	Squaliolus laticaudus Smith & Radcliffe, 1912		Barreiros and Gadig (2011)	least concern	Kyne, P.M. & Burgess, G.H. 2006. Squaliolus laticaudus. The IUCN Red List of Threatened Species 2006: e.T60214A12322117. https://dx.doi.org/10.2305/IUCN.UK.2006.RLTS.T60214A12322117.en. Downloaded on July 2020.
Squaliformes	Dalatiidae	Dalatias licha (Bonnaterre, 1788)		Barreiros and Gadig (2011)	vulnerable	Finucci, B., Walls, R.H.L., Guallart, J. & Kyne, P.M. 2018. Dalatias licha. The IUCN Red List of Threatened Species 2018: e.T6229A3111662. https://dx.doi.org/10.2305/IUCN.UK.2018-2.RLTS.T6229A3111662.en. Downloaded on July 2020.
Squaliformes	Oxynotidae	Oxynotus paradoxus Frade, 1929		Barreiros and Gadig (2011)	data deficient	Soldo, A. & Freitas, M. 2009. Oxynotus paradoxus. The IUCN Red List of Threatened Species 2009: e.T161361A5406422. https://dx.doi.org/10.2305/IUCN.UK.2009-2.RLTS.T161361A5406422.en. Downloaded on July 2020.
Squaliformes	Somniosidae	Zameus squamulosus (Günther, 1877)	In Porteiro et al. (2010) referred by its synonym S. obscurus (Vaillant, 1888)	Das and Afonso (2017)	data deficient	Burgess, G.H. & Chin, A. 2006. Zameus squamulosus. The IUCN Red List of Threatened Species 2006: e.T60215A12322535. https://dx.doi.org/10.2305/IUCN.UK.2006.RLTS.T60215A12322535.en. Downloaded on July 2020.
Squaliformes	Somniosidae	Somniosus rostratus (Risso, 1827)		Barreiros and Gadig (2011)	data deficient	Seret, B., Guallart, J., Vacchi, M., Mancusi, C. & McCormack, C. 2009. Somniosus rostratus. The IUCN Red List of Threatened Species 2009: e.T161432A5422754. https://dx.doi.org/10.2305/IUCN.UK.2009-2.RLTS.T161432A5422754.en. Downloaded on July 2020.
Squaliformes	Somniosidae	Somniosus microcephalus (Bloch & Schneider, 1801)		Barreiros and Gadig (2011)	near threatened	Kyne, P.M., Sherrill-Mix, S.A. & Burgess, G.H. 2006. Somniosus microcephalus. The IUCN Red List of Threatened Species 2006: e.T60213A12321694. https://dx.doi.org/10.2305/IUCN.UK.2006.RLTS.T60213A12321694.en. Downloaded on July 2020.
Squaliformes	Somniosidae	Scymnodalatias garricki Kukuev & Konovalenko, 1988		Barreiros and Gadig (2011)	data deficient	Seret, B., McCormack, C. & Pinho, M. 2015. Scymnodalatias garricki. The IUCN Red List of Threatened Species 2015: e.T161583A48958827. https://dx.doi.org/10.2305/IUCN.UK.2015-1.RLTS.T161583A48958827.en. Downloaded on July 2020.
Squaliformes	Somniosidae	Centroselachus crepidater (Barbosa du Bocage & de Brito Capello, 1864)		Barreiros and Gadig (2011)	least concern	Stevens, J. (SSG Australia & Oceania Regional Workshop, March 2003) 2003. Centroselachus crepidater. The IUCN Red List of Threatened Species 2003: e.T46864A11087086. https://dx.doi.org/10.2305/IUCN.UK.2003.RLTS.T46864A11087086.en. Downloaded on July 2020.
Squaliformes	Somniosidae	Centroscymnus owstonii Garman, 1906		Barreiros and Gadig (2011)	vulnerable	Finucci, B. & Kyne, P.M. 2018. Centroscymnus owstonii. The IUCN Red List of Threatened Species 2018: e.T41749A68615392. https://dx.doi.org/10.2305/IUCN.UK.2018-2.RLTS.T41749A68615392.en. Downloaded on July 2020.
Squaliformes	Somniosidae	Centroscymnus coelolepis Barbosa du Bocage & de Brito Capello, 1864		Barreiros and Gadig (2011)	near threatened	Stevens, J. & Correia, J.P.S. (SSG Australia & Oceania Regional Workshop, March 2003) 2003. Centroscymnus coelolepis. The IUCN Red List of Threatened Species 2003: e.T41747A10552910. https://dx.doi.org/10.2305/IUCN.UK.2003.RLTS.T41747A10552910.en. Downloaded on July 2020.
Squaliformes	Etmopteridae	Etmopterus spinax (Linnaeus, 1758)		Barreiros and Gadig (2011)	least concern	Coelho, R. Blasdale, T., Mancusi, C., Serena, F., Guallart, J., Ungaro, N., Litvinov, F., Crozier, P. & Stenberg, C. 2009. Etmopterus spinax. The IUCN Red List of Threatened Species 2009: e.T161388A5412576. https://dx.doi.org/10.2305/IUCN.UK.2009-2.RLTS.T161388A5412576.en. Downloaded on July 2020.
Squaliformes	Etmopteridae	Etmopterus pusillus (Lowe, 1839)		Barreiros and Gadig (2011)	least concern	Coelho, R., Tanaka, S. & Compagno, L.J.V. 2009. Etmopterus pusillus. The IUCN Red List of Threatened Species 2009: e.T161443A5425124. https://dx.doi.org/10.2305/IUCN.UK.2009-2.RLTS.T161443A5425124.en. Downloaded on July 2020.
Squaliformes	Etmopteridae	Etmopterus princeps Collett, 1904		Barreiros and Gadig (2011)	data deficient	Herndon, A.P. & Burgess, G.H. 2006. Etmopterus princeps. The IUCN Red List of Threatened Species 2006: e.T60242A12332917. https://dx.doi.org/10.2305/IUCN.UK.2006.RLTS.T60242A12332917.en. Downloaded on July 2020.
Squaliformes	Etmopteridae	Centroscyllium fabricii (Reinhardt, 1825)		Barreiros and Gadig (2011)	least concern	Ebert, D.A., Crozier, P. & Blasdale, T. & McCormack, C. 2009. Centroscyllium fabricii. The IUCN Red List of Threatened Species 2009: e.T161521A5442458. https://dx.doi.org/10.2305/IUCN.UK.2009-2.RLTS.T161521A5442458.en. Downloaded on July 2020.
Squaliformes	Centrophoridae	Deania profundorum (Smith & Radcliffe, 1912)		Barreiros and Gadig (2011)	least concern	Ebert, D.A., McCormack, C. & Samiengo, B. 2009. Deania profundorum. The IUCN Red List of Threatened Species 2009: e.T161551A5449518. https://dx.doi.org/10.2305/IUCN.UK.2009-2.RLTS.T161551A5449518.en. Downloaded on July 2020.
Squaliformes	Centrophoridae	Deania calcea (Lowe, 1839)		Barreiros and Gadig (2011)	least concern	Stevens, J. (SSG Australia & Oceania Regional Workshop, March 2003) 2003. Deania calcea. The IUCN Red List of Threatened Species 2003: e.T41798A10549437. https://dx.doi.org/10.2305/IUCN.UK.2003.RLTS.T41798A10549437.en. Downloaded on July 2020.
Squaliformes	Centrophoridae	Centrophorus squamosus (Bonnaterre, 1788)		Barreiros and Gadig (2011)	vulnerable	White, W.T. (SSG Australia & Oceania Regional Workshop, March 2003) 2003. Centrophorus squamosus. The IUCN Red List of Threatened Species 2003: e.T41871A10581731. https://dx.doi.org/10.2305/IUCN.UK.2003.RLTS.T41871A10581731.en. Downloaded on July 2020.
Squaliformes	Centrophoridae	Centrophorus granulosus (Bloch & Schneider, 1801)		Barreiros and Gadig (2011)	critically endangered	Guallart, J., Walls, R.H.L. & Bariche, M. 2015. Centrophorus granulosus. The IUCN Red List of Threatened Species 2015: e.T70705777A48911382. Downloaded on July 2020.
Hexanchiformes	Hexanchidae	Hexanchus griseus (Bonnaterre, 1788)		Barreiros and Gadig (2011)	near threatened	Cook, S.F. & Compagno, L. J.V. 2009. Hexanchus griseus. The IUCN Red List of Threatened Species 2009: e.T10030A3155348. https://dx.doi.org/10.2305/IUCN.UK.2005.RLTS.T10030A3155348.en. Downloaded on July 2020.
Hexanchiformes	Hexanchidae	Heptranchias perlo (Bonnaterre, 1788)		Barreiros and Gadig (2011)	near threatened	Paul, L. & Fowler, S. (SSG Australia & Oceania Regional Workshop, March 2003) 2003. Heptranchias perlo. The IUCN Red List of Threatened Species 2003: e.T41823A10572878. https://dx.doi.org/10.2305/IUCN.UK.2003.RLTS.T41823A10572878.en. Downloaded on July 2020.
Hexanchiformes	Chlamydoselachidae	Chlamydoselachus anguineus Garman, 1884		Das and Afonso (2017)	least concern	Smart, J.J., Paul, L.J. & Fowler, S.L. 2016. Chlamydoselachus anguineus. The IUCN Red List of Threatened Species 2016: e.T41794A68617785. https://dx.doi.org/10.2305/IUCN.UK.2016-1.RLTS.T41794A68617785.en. Downloaded on July 2020.
Myliobatiformes	Mobulidae	Mobula tarapacana (Philippi, 1892)		Barreiros and Gadig (2011)	vulnerable	Marshall, A., Barreto, R., Bigman, J.S., Carlson, J., Fernando, D., Fordham, S., Francis, M.P., Herman, K., Jabado, R.W., Liu, K.M., Pardo, S.A., Rigby, C.L., Romanov, E. & Walls, R.H.L. 2019. Mobula tarapacana. The IUCN Red List of Threatened Species 2019: e.T60199A124451161. https://dx.doi.org/10.2305/IUCN.UK.2019-3.RLTS.T60199A124451161.en. Downloaded on July 2020.
Myliobatiformes	Mobulidae	Mobula mobular (Bonnaterre, 1788)		Das and Afonso (2017)	endangered	Marshall, A., Barreto, R., Carlson, J., Fernando, D., Fordham, S., Francis, M.P., Herman, K., Jabado, R.W., Liu, K.M., Rigby, C.L. & Romanov, E. 2019. Mobula mobular. The IUCN Red List of Threatened Species 2019: e.T110847130A110847142. https://dx.doi.org/10.2305/IUCN.UK.2019-3.RLTS.T110847130A110847142.en. Downloaded on July 2020.
Myliobatiformes	Mobulidae	Mobula birostris (Walbaum, 1792)	formerly in the genus Manta	Barreiros and Gadig (2011)	vulnerable	Marshall, A., Bennett, M.B., Kodja, G., Hinojosa-Alvarez, S., Galvan-Magana, F., Harding, M., Stevens, G. & Kashiwagi, T. 2018. Mobula birostris (amended version of 2011 assessment). The IUCN Red List of Threatened Species 2018: e.T198921A126669349. https://dx.doi.org/10.2305/IUCN.UK.2018-1.RLTS.T198921A126669349.en. Downloaded on July 2020.
Myliobatiformes	Myliobatidae	Myliobatis aquila (Linnaeus, 1758)		Barreiros and Gadig (2011)	data deficient	Holtzhausen, J.A., Ebert, D.A., Serena, F. & Mancusi, C. 2009. Myliobatis aquila. The IUCN Red List of Threatened Species 2009: e.T161569A5454004. https://dx.doi.org/10.2305/IUCN.UK.2009-2.RLTS.T161569A5454004.en. Downloaded on July 2020.
Myliobatiformes	Dasyatidae	Dasyatis pastinaca (Linnaeus, 1758)		Barreiros and Gadig (2011)	data deficient	Serena, F., Mancusi, C., Morey, G. & Ellis, J.R. 2009. Dasyatis pastinaca. The IUCN Red List of Threatened Species 2009: e.T161453A5427586. https://dx.doi.org/10.2305/IUCN.UK.2009-2.RLTS.T161453A5427586.en. Downloaded on July 2020.
Myliobatiformes	Dasyatidae	Pteroplatytrygon violacea (Bonaparte, 1832)		Barreiros and Gadig (2011)	least concern	Kyne, P.M., Barreto, R., Carlson, J., Fernando, D., Francis, M.P., Fordham, S., Jabado, R.W., Liu, K.M., Marshall, A., Pacoureau, N., Romanov, E., Sherley, R.B. & Winker, H. 2019. Pteroplatytrygon violacea. The IUCN Red List of Threatened Species 2019: e.T161731A896169. https://dx.doi.org/10.2305/IUCN.UK.2019-1.RLTS.T161731A896169.en. Downloaded on July 2020.
Myliobatiformes	Dasyatidae	Taeniurops grabatus (Geoffroy St. Hilaire, 1817)	formerly in the genus Taeniura	Barreiros and Gadig (2011)	data deficient	Serena, F., Notarbartolo di Sciara, G. & Mancusi, C. 2009. Taeniurops grabata. The IUCN Red List of Threatened Species 2009: e.T161513A5440298. https://dx.doi.org/10.2305/IUCN.UK.2009-2.RLTS.T161513A5440298.en. Downloaded on July 2020.
Rajiformes	Rajidae	Dipturus batis (Linnaeus, 1758)		Barreiros and Gadig (2011)	critically endangered	Dulvy, N.K., Notarbartolo di Sciara, G., Serena, F., Tinti, F. & Ungaro, N., Mancusi, C. & Ellis, J. 2006. Dipturus batis. The IUCN Red List of Threatened Species 2006: e.T39397A10198950. https://dx.doi.org/10.2305/IUCN.UK.2006.RLTS.T39397A10198950.en. Downloaded on July 2020.
Rajiformes	Rajidae	Leucoraja fullonica (Linnaeus, 1758)		Barreiros and Gadig (2011)	vulnerable	McCully, S. & Walls, R. 2015. Leucoraja fullonica. The IUCN Red List of Threatened Species 2015: e.T161461A48938639. https://dx.doi.org/10.2305/IUCN.UK.2015-1.RLTS.T161461A48938639.en. Downloaded on July 2020.
Rajiformes	Rajidae	Raja brachyura Lafont, 1873		Barreiros and Gadig (2011)	near threatened	Ellis, J., Ungaro, N., Serena, F., Dulvy, N.K., Tinti, F., Bertozzi, M., Pasolini, P., Mancusi, C. & Noarbartolo di Sciara, G. 2009. Raja brachyura. The IUCN Red List of Threatened Species 2009: e.T161691A5481210. https://dx.doi.org/10.2305/IUCN.UK.2009-2.RLTS.T161691A5481210.en. Downloaded on July 2020.
Rajiformes	Rajidae	Raja clavata Linnaeus, 1758		Barreiros and Gadig (2011)	near threatened	Ellis, J. 2016. Raja clavata. The IUCN Red List of Threatened Species 2016: e.T39399A103110667. https://dx.doi.org/10.2305/IUCN.UK.2016-3.RLTS.T39399A103110667.en. Downloaded on July 2020.
Rajiformes	Rajidae	Raja maderensis Lowe, 1838		Barreiros and Gadig (2011)	vulnerable	Dulvy, N.K., Walls, R.H.L., Buscher, E. & Stehmann, M.F.W. 2015. Raja maderensis. The IUCN Red List of Threatened Species 2015: e.T161459A48939762. https://dx.doi.org/10.2305/IUCN.UK.2015-1.RLTS.T161459A48939762.en. Downloaded on July 2020.
Rajiformes	Rajidae	Rajella bigelowi (Stehmann, 1978)		Barreiros and Gadig (2011)	least concern	Orlov, A., Kulka, D., Barker, A.S. & Stehmann, M. 2009. Rajella bigelowi. The IUCN Red List of Threatened Species 2009: e.T161371A5408340. https://dx.doi.org/10.2305/IUCN.UK.2009-2.RLTS.T161371A5408340.en. Downloaded on July 2020.
Rajiformes	Rajidae	Dipturus oxyrinchus (Linnaeus, 1758)		Das and Afonso (2017)	near threatened	Ellis, J., Abella, A., Serena, F., Stehmann, M.F.W. & Walls, R. 2015. Dipturus oxyrinchus. The IUCN Red List of Threatened Species 2015: e.T63100A48908629. https://dx.doi.org/10.2305/IUCN.UK.2015-1.RLTS.T63100A48908629.en. Downloaded on July 2020.
Rajiformes	Rajidae	Bathyraja richardsoni (Garrick, 1961)		Das and Afonso (2017)	least concern	Kulka, D.W., Orlov, A. & Barker, A.S. 2015. Bathyraja richardsoni. The IUCN Red List of Threatened Species 2015: e.T63127A70709214. https://dx.doi.org/10.2305/IUCN.UK.2015-4.RLTS.T63127A70709214.en. Downloaded on July 2020.
Torpediniformes	Torpedinidae	Tetronarce nobiliana (Bonaparte, 1835)	formerly in the genus Torpedo	Barreiros and Gadig (2011)	data deficient	Notarbartolo di Sciara, G., Serena, F., Ungaro, N., Ferretti, F., Holtzhausen, H.A. & Smale, M.J. 2009. Tetronarce nobiliana. The IUCN Red List of Threatened Species 2009: e.T161580A5456479. https://dx.doi.org/10.2305/IUCN.UK.2009-2.RLTS.T161580A5456479.en. Downloaded on July 2020.
References:
Barreiros J, Gadig OF (2011). Sharks and Rays from the Azores an illustrated Catalogue. 1st. IAC - Instituto Açoriano de Cultura, Angra do Heroísmo, Portugal.
Catarino D, Jakobsen K, Jakobsen J, Giacomello E, Menezes GM, Diogo H, Canha A, Porteiro FM, Melo O, Stefanni S (2020). First record of the opal chimaera, Chimaera opalescens (Holocephali: Chimaeridae) and revision of the occurrence of the rabbitfish Chimaera monstrosa in the Azores waters. Journal of Fish Biology 97(1): 763-775.
Das D, Afonso P (2017). Review of the Diversity, Ecology, and Conservation of Elasmobranchs in the Azores Region, Mid-North Atlantic. Frontiers in Marine Science 4: 1-19.
Porteiro FM, Menezes GM, Afonso P, Monteiro JG, Santos RS (2010). Marine fish (Chondrichthyes, Actinopterygii). In: Borges PAV, Costa A, Cunha R, Gabriel R, Gonçalves V, Martins AF, Melo I, Parente M, Raposeiro P, Rodrigues P, Santos RS, Silva L, Vieira P, Vieira V (Eds) A list of the terrestrial and marine biota from the Azores. Principia, Cascais, 3 pp.
Santos R, Novoa-Pabon A, Silva H, Pinho M (2020). Elasmobranch species richness, fisheries, abundance and size composition in the Azores archipelago (NE Atlantic). Marine Biology Research 16 (2): 103‑116.
